# Supplementary material for: Simulating ComBat: how batch correction can lead to the systematic introduction of false positive results in DNA methylation microarray studies
Source: PubMed Central journal article supplement (PMC7328269; doi:10.1186/s12859-020-03559-6), 2020-06-30
Supplement: 12859_2020_3559_MOESM4_ESM.pdf [file 12859_2020_3559_MOESM4_ESM.pdf]

Supplementary Table 1 – Full report of the simulation results without simulated batch effects

100 simulation runs with  $n=48$  samples

|                                 | balanced                  |                           |                                                    |                                           | random                    |                           |                                                     |                                           | unbalanced                |                           |                                                           |                                                    |
|---------------------------------|---------------------------|---------------------------|----------------------------------------------------|-------------------------------------------|---------------------------|---------------------------|-----------------------------------------------------|-------------------------------------------|---------------------------|---------------------------|-----------------------------------------------------------|----------------------------------------------------|
|                                 | mean- $p$                 | $\lambda^+$               | FDR*                                               | BF**                                      | mean- $p$                 | $\lambda^+$               | FDR*                                                | BF**                                      | mean- $p$                 | $\lambda^+$               | FDR*                                                      | BF**                                               |
| ComBat (SVA) without $mod^{++}$ | $M=0.4694$<br>$SD=0.0035$ | $M=1.2424$<br>$SD=0.0027$ | $M=7.71$<br>$SD=9.87$<br>min=0<br>max=55           | $M=1.30$<br>$SD=1.06$<br>min=0<br>max=4   | $M=0.4869$<br>$SD=0.0029$ | $M=1.1113$<br>$SD=0.0065$ | $M=0.38$<br>$SD=0.69$<br>min=0<br>max=3             | $M=0.30$<br>$SD=0.52$<br>min=0<br>max=2   | $M=0.5781$<br>$SD=0.0027$ | $M=0.6133$<br>$SD=0.0065$ | $M=0$<br>$SD=0$<br>min=0<br>max=0                         | $M=0$<br>$SD=0$<br>min=0<br>max=0                  |
| ComBat (SVA) with $mod^{++}$    | $M=0.4131$<br>$SD=0.0034$ | $M=1.7282$<br>$SD=0.0036$ | $M=3397.72$<br>$SD=916.07$<br>min=2509<br>max=7375 | $M=16.91$<br>$SD=4.66$<br>min=7<br>max=31 | $M=0.4075$<br>$SD=0.0029$ | $M=1.7879$<br>$SD=0.0112$ | $M=4939.89$<br>$SD=988.39$<br>min=3550<br>max=9009  | $M=21.62$<br>$SD=5.98$<br>min=8<br>max=41 | $M=0.3370$<br>$SD=0.0034$ | $M=2.7773$<br>$SD=0.0552$ | $M=68913.91$<br>$SD=4982.63$<br>min=61438<br>max=85181    | $M=503.57$<br>$SD=69.22$<br>min=407<br>max=754     |
| ComBat (ChAMP)                  | $M=0.4143$<br>$SD=0.0034$ | $M=1.7165$<br>$SD=0.0036$ | $M=3159.64$<br>$SD=886.81$<br>min=2271<br>max=7033 | $M=16.06$<br>$SD=4.55$<br>min=7<br>max=28 | $M=0.4053$<br>$SD=0.0029$ | $M=1.8119$<br>$SD=0.0131$ | $M=5597.48$<br>$SD=1056.49$<br>min=3939<br>max=9687 | $M=23.81$<br>$SD=6.23$<br>min=8<br>max=47 | $M=0.3126$<br>$SD=0.0683$ | $M=3.2653$<br>$SD=0.0684$ | $M=109097.83$<br>$SD=5594.35$<br>min=100391<br>max=126782 | $M=1293.38$<br>$SD=140.28$<br>min=1078<br>max=1851 |
| Without ComBat                  | $M=0.5023$<br>$SD=0.0035$ |                           | $M=0.04$<br>$SD=0.19$<br>min=0<br>max=1            | $M=0.04$<br>$SD=0.19$<br>min=0<br>max=1   | $M=0.5026$<br>$SD=0.0027$ |                           | $M=0.11$<br>$SD=0.34$<br>min=0<br>max=2             | $M=0.10$<br>$SD=0.30$<br>min=0<br>max=1   | $M=0.5026$<br>$SD=0.0028$ |                           | $M=0.38$<br>$SD=0.69$<br>min=0<br>max=1                   | $M=0.3$<br>$SD=0.52$<br>min=0<br>max=1             |

$^{++}$  Model matrix for outcome of interest

$^+$  Genomic Inflation Factor  $\lambda$

\* Significant CpG sites with False Discovery Rate 5%

\*\* Significant CpG sites with Bonferroni correction 5%
