# Supplementary material for: Simulating ComBat: how batch correction can lead to the systematic introduction of false positive results in DNA methylation microarray studies
Source: PubMed Central journal article supplement (PMC7328269; doi:10.1186/s12859-020-03559-6), 2020-06-30
Supplement: 12859_2020_3559_MOESM5_ESM.pdf [file 12859_2020_3559_MOESM5_ESM.pdf]

Supplementary Table 2 – Full report of the simulation results with simulated batch effects

100 simulation runs with  $n=48$  samples

|                                 | balanced                  |                           |                                                       |                                             | random                    |                           |                                                         |                                                | unbalanced                |                           |                                                              |                                                     |
|---------------------------------|---------------------------|---------------------------|-------------------------------------------------------|---------------------------------------------|---------------------------|---------------------------|---------------------------------------------------------|------------------------------------------------|---------------------------|---------------------------|--------------------------------------------------------------|-----------------------------------------------------|
|                                 | mean- $p$                 | $\lambda^+$               | FDR*                                                  | BF**                                        | mean- $p$                 | $\lambda^+$               | FDR*                                                    | BF**                                           | mean- $p$                 | $\lambda^+$               | FDR*                                                         | BF**                                                |
| ComBat (SVA) without $mod^{++}$ | $M=0.4718$<br>$SD=0.0066$ | $M=1.6830$<br>$SD=0.1044$ | $M=8.9$<br>$SD=12.37$<br>min=0<br>max=90              | $M=1.2100$<br>$SD=0.1044$<br>min=0<br>max=6 | $M=0.5182$<br>$SD=0.0010$ | $M=0.9638$<br>$SD=0.2505$ | $M=0$<br>$SD=0$<br>min=0<br>max=0                       | $M=0$<br>$SD=0$<br>min=0<br>max=0              | $M=0.5932$<br>$SD=0.0234$ | $M=0.4462$<br>$SD=0.1916$ | $M=0$<br>$SD=0$<br>min=0<br>max=0                            | $M=0$<br>$SD=0$<br>min=0<br>max=0                   |
| ComBat (SVA) with $mod^{++}$    | $M=0.4156$<br>$SD=0.0058$ | $M=2.3471$<br>$SD=0.1385$ | $M=3486.40$<br>$SD=1115.10$<br>min=211.30<br>max=8339 | $M=18.11$<br>$SD=5.33$<br>min=7<br>max=34   | $M=0.3775$<br>$SD=0.0281$ | $M=2.2440$<br>$SD=0.2505$ | $M=23004.12$<br>$SD=22965.91$<br>min=6661<br>max=164515 | $M=91.75$<br>$SD=158.56$<br>min=25<br>max=1185 | $M=0.3084$<br>$SD=0.0183$ | $M=2.744$<br>$SD=1.1052$  | $M=116301.55$<br>$SD=33699.57652$<br>min=73945<br>max=281912 | $M=1555.86$<br>$SD=1555.22$<br>min=615<br>max=14930 |
| ComBat (ChAMP)                  | $M=0.4440$<br>$SD=0.019$  | $M=2.0752$<br>$SD=0.1373$ | $M=1204.11$<br>$SD=990.59$<br>min=246<br>max=6156     | $M=10.03$<br>$SD=4.17$<br>min=3<br>max=26   | $M=0.3966$<br>$SD=0.0178$ | $M=0.3966$<br>$SD=0.0178$ | $M=11542.92$<br>$SD=7007.60$<br>min=2434<br>max=52349   | $M=51.2$<br>$SD=24.54$<br>min=18<br>max=185    | $M=0.3199$<br>$SD=0.0219$ | $M=2.8676$<br>$SD=1.3157$ | $M=113820.47$<br>$SD=33810.66$<br>min=53877<br>max=220904    | $M=2155.95$<br>$SD=1740.92$<br>min=526<br>max=9531  |
| Without ComBat                  | $M=0.5879$<br>$SD=0.0187$ |                           | $M=0.01$<br>$SD=0.1$<br>min=0<br>max=1                | $M=0.01$<br>$SD=0.1$<br>min=0<br>max=1      | $M=0.4840$<br>$SD=0.1011$ |                           | $M=2949.66$<br>$SD=29494.88$<br>min=0<br>max=294949     | $M=0.10$<br>$SD=0.36$<br>min=2<br>max=2        | $M=0.4057$<br>$SD=0.1341$ |                           | $M=41912.5$<br>$SD=111629.70$<br>min=0<br>max=547084         | $M=6.26$<br>$SD=47.29$<br>min=0<br>max=470          |

$^{++}$  Model matrix for outcome of interest

$^+$  Genomic Inflation Factor  $\lambda$

\* Significant CpG sites with False Discovery Rate 5%

\*\* Significant CpG sites with Bonferroni correction 5%
